# Supplementary material for: VEGF Treatment Ameliorates Depression-Like Behavior in Adult Offspring after Maternal Immune Activation
Source: Cells. 2020 Apr 22;9(4):1048. doi: 10.3390/cells9041048 (PMC7226255; doi:10.3390/cells9041048)
Supplement: Supplementary file 1 [file cells-09-01048-s001.pdf]

**Supplementary Table S1: Reporting checklist for maternal immune activation (MIA).**

| <b>a. Compound</b>                                                     |                                                 |
|------------------------------------------------------------------------|-------------------------------------------------|
| Name of compound:                                                      | Polyinosinic:polycytidylic acid (Sigma-Aldrich) |
| Catalogue number:                                                      | P9582                                           |
| Lot number:                                                            | 096M4023V                                       |
| Vehicle control used:                                                  | 0.9% physiological NaCl                         |
| Route of administration:                                               | intraperitoneal                                 |
| Volume administered:                                                   | 20mg/kg (10µL/g)                                |
| Storage conditions:                                                    | -20 °C                                          |
| b. Housing variables at injection                                      |                                                 |
| Temperature of room at injection time:                                 | 23,2 °C                                         |
| Light cycle of animal housing room:                                    | light/dark 12:12                                |
| Time of day of injection:                                              | 9:00–11:00 AM                                   |
| Did a cage change occur at time of injection:                          | no                                              |
| c. Validation of immune activation                                     |                                                 |
| sickness behavior scoring 2 h and 4 h after injection                  |                                                 |
| d. Validation of gestational timing                                    |                                                 |
| timed mating and vaginal plug                                          |                                                 |
| e. Animals                                                             |                                                 |
| Species:                                                               | Mouse                                           |
| Strain:                                                                | C57Bl6/N                                        |
| Maternal physiological variables at time of immune challenge:          |                                                 |
| maternal Age at challenge:                                             | 11/12 weeks                                     |
| maternal Body weight:                                                  | ~30,1g (average weight)                         |
| Vendor:                                                                | Charles River Laboratories, Sulzfeld Germany    |
| f. Caging systems                                                      |                                                 |
| at breeding: IVC                                                       |                                                 |
| Material of cage:                                                      | plastic                                         |
| Cage dimensions:                                                       | 19.56 × 30.91 × 13.34 cm                        |
| after parturition: open cages                                          |                                                 |
| Material of cage:                                                      | plastic                                         |
| Cage dimensions                                                        | 19.56 × 30.91 × 13.34 cm                        |
| after weaning: IVC                                                     |                                                 |
| Material of cage:                                                      | plastic                                         |
| Cage dimensions:                                                       | 19.56 × 30.91 × 13.34 cm                        |
| g. Animal Holding Room                                                 |                                                 |
| Temperature in room:                                                   | 22–24 °C                                        |
| Humidity in room:                                                      | ~ 50%                                           |
| Ventilation system:                                                    | IVC or open cages                               |
| Specific pathogen free [SPF]:                                          | no                                              |
| Are males & females housed in the same or separate rooms:              | same room, but separate areas                   |
| h. Bedding exchanges/bedding type                                      |                                                 |
| Type of cage bedding used:                                             | Premium scientific bedding (SAFE)               |
| Frequency of cage changes per week:                                    |                                                 |
| prior to mating and after weaning:                                     | once                                            |
| during gestation:                                                      | twice                                           |
| during neonatal period:                                                | no cleaning till postnatal day 7                |
| i. Breeding                                                            |                                                 |
| timed pregnancy on site                                                |                                                 |
| are the same fathers breeding with both experimental and control dams? | NO                                              |
| Biological age at shipping:                                            | 7/8 weeks                                       |
| Biological age of dams:                                                | 9/10 weeks                                      |
| Number of Dams bred:                                                   | 20                                              |
| How many times have dams been mated previously:                        | NONE                                            |

|                                                                                     |                            |
|-------------------------------------------------------------------------------------|----------------------------|
| How many times did the dams mate and not become pregnant:                           | NONE                       |
| Are the dams primiparous or multiparous?                                            | Primiparous                |
| What was the frequency of maternal handling during the gestational/neonatal period: | twice a week               |
| Biological age of sires:                                                            | 9–18 weeks                 |
| Number of sires bred:                                                               | 10                         |
| How many times have sires been mated previously:                                    | 0–4                        |
| How many times did the sires mate successfully:                                     | once                       |
| If bred previously, what was the interval between mating times:                     | one month                  |
| Are sires matched to experimental and control dams:                                 | yes                        |
| Describe the mating design (1:1, 1:2 etc):                                          | 1:2                        |
| j. Social enrichment                                                                |                            |
| Number of cage companions prior to breeding:                                        | 3–5                        |
| Gestational age when dam separated for breeding:                                    | 9/10 weeks                 |
| Number of cage companions at weaning:                                               | 2–5                        |
| k. Physical enrichment                                                              |                            |
| Type and quantity of enrichment device:                                             | 1 paper towel/ cage        |
| l. Details on animal numbers and distribution                                       |                            |
| Maternal- N vs offspring N                                                          |                            |
| total number of -dams/litters included in the study:                                |                            |
| total number of offspring per litter included in the study:                         |                            |
| Litter size and sex distribution                                                    |                            |
| What size was each litter maintained at:                                            | 6–11 (total number)        |
| How many males and females were maintained in each litter:                          |                            |
| How many offspring per litter were used in each measure:                            |                            |
| Randomization/Matching procedures:                                                  | randomization              |
| Sex as a biological variable:                                                       | only males used            |
| Age(s) of offspring at behavioral testing/ physiological evaluation:                |                            |
| Unit of analysis for each data set:                                                 | based on number of animals |

Supplementary Table S2: Full summary of statistical results.

| Figure | Experiment                    | Parameter          | Statistical Test | n / group | Factor     | Statistics, Degrees of Freedom | P value    | Multiple Comparisons  | P value Fischer's LSD |
|--------|-------------------------------|--------------------|------------------|-----------|------------|--------------------------------|------------|-----------------------|-----------------------|
| 2A     | Sucrose Preference Test (SPT) | Sucrose Preference | 2-way ANOVA      | 8–15      |            |                                |            | CON:VEH vs. CON:VEGF  | 0.4248                |
|        |                               |                    |                  |           | VEGF x MIA | F (1, 42) = 1,912              | P = 0,1740 | CON:VEH vs. MIA:VEH   | 0.0093                |
|        |                               |                    |                  |           | VEGF       | F (1, 42) = 0,01519            | P = 0,9025 | CON:VEH vs. MIA:VEGF  | 0.0866                |
|        |                               |                    |                  |           | MIA        | F (1, 42) = 7,043              | P = 0,0112 | CON:VEGF vs. MIA:VEH  | 0.0515                |
|        |                               |                    |                  |           |            |                                |            | CON:VEGF vs. MIA:VEGF | 0.35                  |
| 2B     | Tail-Suspension Test (TST)    | % Immobility       | 2-way ANOVA      | 9–15      |            |                                |            | MIA:VEH vs. MIA:VEGF  | 0.2344                |
|        |                               |                    |                  |           |            |                                |            | CON:VEH vs. CON:VEGF  | 0.1735                |
|        |                               |                    |                  |           | VEGF x MIA | F (1, 43) = 4,214              | P = 0,0462 | CON:VEH vs. MIA:VEH   | 0.0174                |
|        |                               |                    |                  |           | VEGF       | F (1, 43) = 0,006874           | P = 0,9343 | CON:VEH vs. MIA:VEGF  | 0.2552                |
|        |                               |                    |                  |           | MIA        | F (1, 43) = 2,402              | P = 0,1285 | CON:VEGF vs. MIA:VEH  | 0.3048                |

|        |                                          |                                  |                     |              |               |                                      |                   | CON:VEGF <i>vs.</i><br>MIA:VEGF                       | 0.7155                      |
|--------|------------------------------------------|----------------------------------|---------------------|--------------|---------------|--------------------------------------|-------------------|-------------------------------------------------------|-----------------------------|
|        |                                          |                                  |                     |              |               |                                      |                   | MIA:VEH <i>vs.</i><br>MIA:VEGF                        | 0.129                       |
| 3A     | t-ERK 1/2<br>(Total ERK<br>levels)       | Relative t-<br>ERK 1/2<br>levels | 2-way<br>ANOVA      | 9–10         | VEGF x<br>MIA | F (1, 34) =<br>3,284                 | <i>P</i> = 0,0788 |                                                       |                             |
|        |                                          |                                  |                     |              | VEGF          | F (1, 34) =<br>1,076                 | <i>P</i> = 0,3068 |                                                       |                             |
|        |                                          |                                  |                     |              | MIA           | F (1, 34) =<br>1,882                 | <i>P</i> = 0,1791 |                                                       |                             |
|        |                                          |                                  |                     |              |               |                                      |                   |                                                       |                             |
|        |                                          |                                  |                     |              |               |                                      |                   |                                                       |                             |
| Figure | Experiment                               | Parameter                        | Statistical<br>test | n /<br>group | Factor        | Statistics,<br>degrees of<br>freedom | <i>P</i><br>value | Multiple<br>comparisons                               | P value<br>Fischer's<br>LSD |
| 3B     | p-ERK 1/2<br>(Phospho-ERK<br>1/2 levels) | Relative p-<br>ERK 1/2<br>levels | 2-way<br>ANOVA      | 9–10         |               |                                      |                   | CON:VEH <i>vs.</i><br>CON:VEGF                        | 0.0151                      |
|        |                                          |                                  |                     |              | VEGF x<br>MIA | F (1, 34) =<br>2,437                 | <i>P</i> = 0,1278 | CON:VEH <i>vs.</i><br>MIA:VEH                         | 0.2418                      |
|        |                                          |                                  |                     |              | VEGF          | F (1, 34) =<br>4,634                 | <i>P</i> = 0,0385 | CON:VEH <i>vs.</i><br>MIA:VEGF                        | 0.1168                      |
|        |                                          |                                  |                     |              | MIA           | F (1, 34) =<br>0,01527               | <i>P</i> = 0,9024 | CON:VEGF <i>vs.</i><br>MIA:VEH                        | 0.1605                      |
|        |                                          |                                  |                     |              |               |                                      |                   | CON:VEGF <i>vs.</i><br>MIA:VEGF                       | 0.3166                      |
|        |                                          |                                  |                     |              |               |                                      |                   | MIA:VEH <i>vs.</i><br>MIA:VEGF                        | 0.6701                      |
|        |                                          |                                  |                     |              |               |                                      |                   | <i>P</i> values < 0.05 were<br>considered significant |                             |
